# Supplementary material for: Aberrant Regulation of HDAC2 Mediates Proliferation of Hepatocellular Carcinoma Cells by Deregulating Expression of G1/S Cell Cycle Proteins
Source: PLoS One. 2011 Nov 23;6(11):e28103. doi: 10.1371/journal.pone.0028103 (PMC3223227; doi:10.1371/journal.pone.0028103)
Supplement: Table S1 — Oligonucleotide sequence for HDAC2 shRNA plasmid construction. (XLS) [file pone.0028103.s006.xls]

## Sheet: Sheet1
Table S1. Oligonucleotide sequence for HDAC2 shRNA plasmid construction
Oligo	Sequence
si-#1_top	GATCCGGATTACATCATGCTAAGATTCAAGAGATCTTAGCATGATGTAATCCTTTTTTGGAAA
si-#1_bottom	AGCTTTTCCAAAAAAGGATTACATCATGCTAAGATCTCTTGAATCTTAGCATGATGTAATCCG
si-#2_top	GATCCGGAAGAAGATAAATCCAAGTTCAAGAGACTTGGATTTATCTTCTTCCTTTTTTGGAAA
si-#2_bottom	AGCTTTTCCAAAAAAGGAAGAAGATAAATCCAAGTCTCTTGAACTTGGATTTATCTTCTTCCG
