# Supplementary material for: Aberrant Regulation of HDAC2 Mediates Proliferation of Hepatocellular Carcinoma Cells by Deregulating Expression of G1/S Cell Cycle Proteins
Source: PLoS One. 2011 Nov 23;6(11):e28103. doi: 10.1371/journal.pone.0028103 (PMC3223227; doi:10.1371/journal.pone.0028103)
Supplement: Table S2 — HDAC2 siRNA sequences used in this study. (XLS) [file pone.0028103.s007.xls]

## Sheet: Sheet1
Table S2. HDAC2 siRNA sequences used in this study
siRNA	Sequence
HDAC2 si-#1	GGAUUACAUCAUGCUAAGATT
HDAC2 si-#2	GGAAGAAGAUAAAUCCAAGTT
